# Supplementary material
Source: PubMed Central journal article supplement (PMC3185154)

Supplement Figure 1

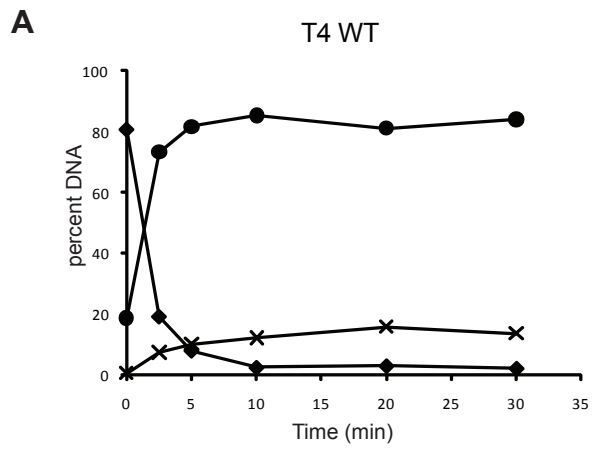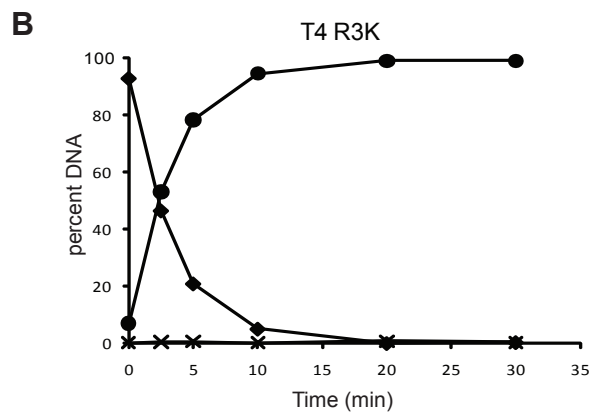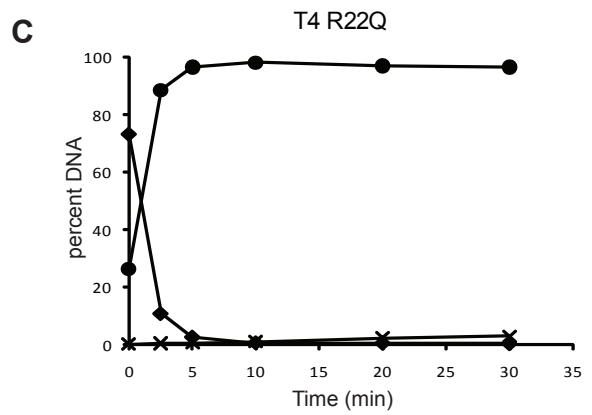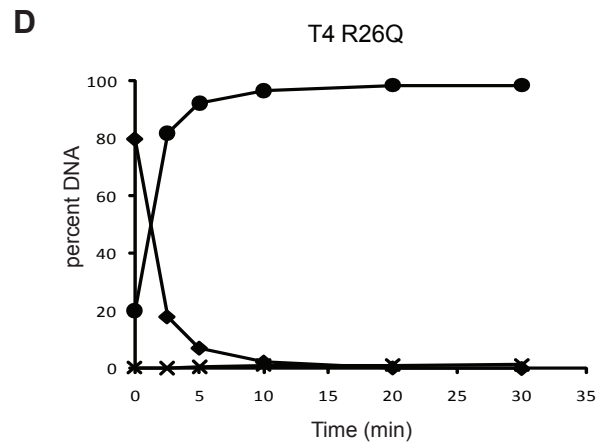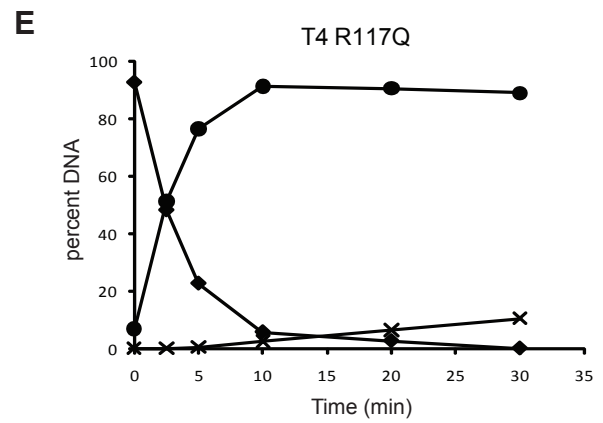

Supplement: NIHMS323357-supplement-01.pdf [file NIHMS323357-supplement-01.pdf]

Supplement Figure 2

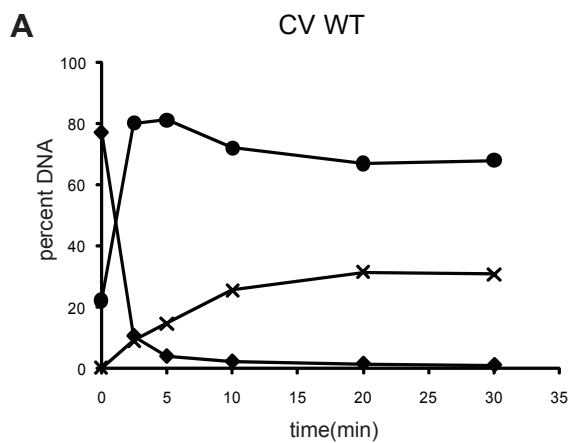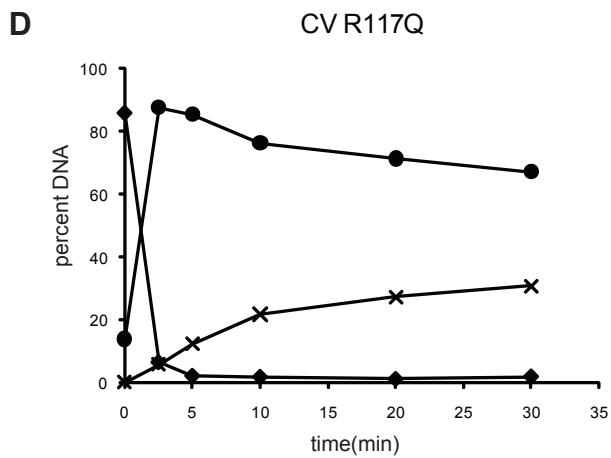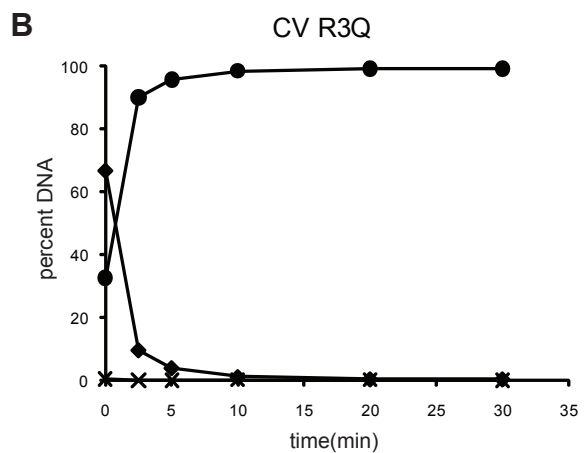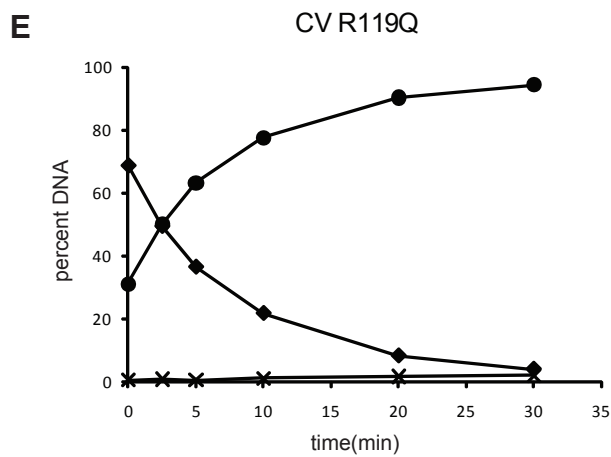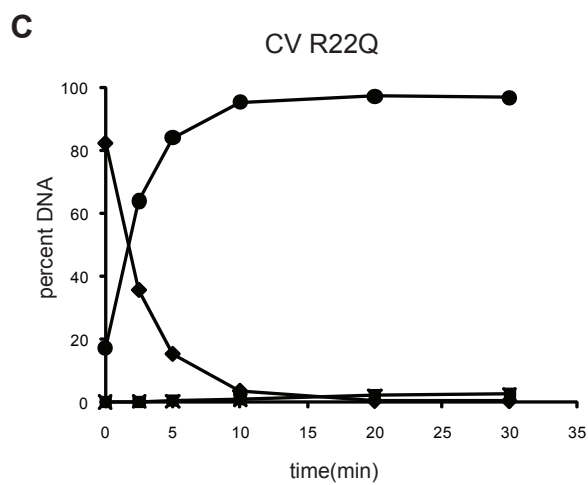

Supplement: NIHMS323357-supplement-02.pdf [file NIHMS323357-supplement-02.pdf]
